# Supplementary material for: Dual-Process Theory of Thought and Inhibitory Control: An ALE Meta-Analysis
Source: MDPI journal article supplement (doi:10.3390/brainsci14010101), 2024-01-20
Supplement: s1 [file s1]

**Table S2.** Studies contribution to the clusters.

|                                                                                                                                                                                |
|--------------------------------------------------------------------------------------------------------------------------------------------------------------------------------|
| <b>Contributors to cluster #1</b>                                                                                                                                              |
| 3 foci from Vartanian, 2018: The Reflective Mind: Examining Individual Differences in Susceptibility to Base Rate Neglect with fMRI. J Cogn Neurosci                           |
| 1 foci from Megias, 2015: Neural mechanisms underlying urgent and evaluative behaviors: An fMRI study on the interaction of automatic and controlled processes. Hum Brain Mapp |
| 2 foci from Liang, 2014: Different neural systems contribute to semantic bias and conflict detection in the inclusion fallacy task. Front Hum Neurosci                         |
| 1 foci from von Helversen, 2014a: Neural substrates of similarity and rule-based strategies in judgment. Front Hum Neurosci                                                    |
| 2 foci from Beierholm, 2011: Separate encoding of model-based and model-free valuations in the human brain. Neuroimage                                                         |
| 1 foci from Liang, 2014: Different strategies in solving series completion inductive reasoning problems: An fMRI and computational study. Int J Psychophysiol.                 |
| <b>Contributors to cluster #2</b>                                                                                                                                              |
| 1 foci from Vartanian, 2018: The Reflective Mind: Examining Individual Differences in Susceptibility to Base Rate Neglect with fMRI. J Cogn Neurosci                           |
| 1 foci from Liang, 2014: Different neural systems contribute to semantic bias and conflict detection in the inclusion fallacy task. Front Hum Neurosci                         |
| 2 foci from Beierholm, 2011: Separate encoding of model-based and model-free valuations in the human brain. Neuroimage                                                         |
| 2 foci from Liang, 2014: Different strategies in solving series completion inductive reasoning problems: An fMRI and computational study. Int J Psychophysiol.                 |
