# Supplementary material for: Dual-Process Theory of Thought and Inhibitory Control: An ALE Meta-Analysis
Source: MDPI journal article supplement (doi:10.3390/brainsci14010101), 2024-01-20
Supplement: s1 [file s1]

**Table S1.** Quality assesement of the included studies based guidelines for the standardized reporting of MRI studies (Poldrack, R. A. et al. Guidelines for reporting an fMRI study. Neuroimage 40, 409–414, 2008).

| Study                     | Age reported | Sample gender reported | Sample handedness reported | Ethics approval reported | Image acquisition described | Image processing described | Statistical MRI analysis described | Software package specified | Multiple comparison correction |
|---------------------------|--------------|------------------------|----------------------------|--------------------------|-----------------------------|----------------------------|------------------------------------|----------------------------|--------------------------------|
| Goel et al. 2003          | yes          | yes                    | yes                        | yes                      | yes                         | yes                        | yes                                | yes                        | yes                            |
| Canessa et al. 2005       | yes          | yes                    | yes                        | yes                      | yes                         | yes                        | yes                                | yes                        | yes                            |
| Beierholm et al. 2011     | no           | no                     | no                         | yes                      | yes                         | yes                        | yes                                | yes                        | no                             |
| Liu et al. 2012           | yes          | yes                    | yes                        | yes                      | yes                         | yes                        | yes                                | yes                        | yes                            |
| Liang et al. 2014         | yes          | yes                    | yes                        | yes                      | yes                         | yes                        | yes                                | yes                        | yes                            |
| Liang et al. 2014         | yes          | yes                    | yes                        | yes                      | yes                         | yes                        | yes                                | yes                        | yes                            |
| Luo et al. 2014           | yes          | yes                    | yes                        | yes                      | yes                         | yes                        | yes                                | yes                        | yes                            |
| von Helversen et al. 2014 | yes          | yes                    | yes                        | yes                      | yes                         | yes                        | yes                                | yes                        | yes                            |
| Durning et al. 2015       | yes          | yes                    | yes                        | yes                      | yes                         | yes                        | yes                                | yes                        | yes                            |
| Megias et al. 2015        | yes          | yes                    | no                         | yes                      | yes                         | yes                        | yes                                | yes                        | yes                            |
| Vartanian et al. 2018     | yes          | yes                    | yes                        | yes                      | yes                         | yes                        | yes                                | yes                        | yes                            |
| van den Berg et al. 2020  | yes          | yes                    | no                         | yes                      | yes                         | yes                        | yes                                | yes                        | yes                            |
